# Supplementary material
Source: HighWire-hosted journal article supplement (https://bmjopen.bmj.com/content/9/1/e024277)
Supplement: inline-supplementary-material-1 [file inline-supplementary-material-1.pdf]

### **Good Reporting of A Mixed Methods Study (GRAMMS) checklist**

| <b>Guideline</b>                                                                            | <b>Section: page</b>                    |
|---------------------------------------------------------------------------------------------|-----------------------------------------|
| Describe the justification for using a mixed methods approach to the research question      | Methods- under procedures pg. 8         |
| Describe the design in terms of the purpose, priority and sequence of methods               | Methods- procedures pg. 7-8             |
| Describe each method in terms of sampling, data collection and analysis                     | Procedures pg 7-8<br>Analysis: pg. 9-10 |
| Describe where integration has occurred, how it has occurred and who has participated in it | Design: pg. 7-8                         |
| Describe any limitation of one method associated with the present of the other method       | Discussion pg. 15-17                    |
| Describe any insights gained from mixing or integrating methods                             | Discussion: pg. 15-17                   |

O'Cathain A, Murphy E, Nicholl J. The quality of mixed methods studies in health services research. *J Health Serv Res Policy*. 2008;13: 92-98.
